# Supplementary material for: Tempering Improves Flour Properties of Refined Intermediate Wheatgrass (Thinopyrum intermedium)
Source: PubMed Central journal article supplement (PMC6723072; doi:10.3390/foods8080337), 2019-08-10
Supplement: foods-08-00337-s001.pdf [file foods-08-00337-s001.pdf]

**Table S1.** Pearson correlation coefficients among intermediate wheatgrass flour parameters. Values in bold followed by one or two asterisks reflect significant correlations at  $p < 0.05$  and  $p < 0.01$ , respectively.

|          | LaSRC | SCSRC  | SuSRC         | WSRC          | <i>L</i>       | <i>a</i>        | <i>b</i>       | SD              | PPO             | Starch          | Protein         | Ash             | ISF             |
|----------|-------|--------|---------------|---------------|----------------|-----------------|----------------|-----------------|-----------------|-----------------|-----------------|-----------------|-----------------|
| LaSRC    |       | -0.456 | <b>0.580*</b> | 0.320         | <b>0.805**</b> | <b>-0.837**</b> | <b>0.831**</b> | <b>0.842**</b>  | <b>-0.710**</b> | <b>0.841**</b>  | -0.357          | <b>-0.739**</b> | <b>-0.746**</b> |
| SCSRC    |       |        | 0.005         | 0.005         | <b>0.527*</b>  | <b>0.566*</b>   | -0.458         | -0.315          | <b>0.564*</b>   | <b>-0.557*</b>  | -0.330          | -0.327          | <b>0.605**</b>  |
| SuSRC    |       |        |               | <b>0.477*</b> | 0.446          | <b>-0.487*</b>  | <b>0.485*</b>  | <b>0.614**</b>  | -0.367          | <b>0.466</b>    | <b>-0.598**</b> | 0.358           | -0.395          |
| WSRC     |       |        |               |               | 0.021          | -0.061          | 0.183          | <b>0.500*</b>   | -0.627          | <b>0.301</b>    | <b>-0.627**</b> | 0.219           | 0.023           |
| <i>L</i> |       |        |               |               |                | -0.972          | 0.953          | <b>0.692**</b>  | <b>-0.890**</b> | <b>0.7604**</b> | 0.194           | <b>-0.849**</b> | <b>-0.909**</b> |
| <i>a</i> |       |        |               |               |                |                 |                | <b>-0.767**</b> | <b>0.895**</b>  | <b>-0.817**</b> | 0.260           | <b>0.898**</b>  | <b>0.934**</b>  |
| <i>b</i> |       |        |               |               |                |                 |                | <b>0.809**</b>  | <b>-0.808**</b> | <b>0.807**</b>  | -0.312          | <b>-0.824**</b> | <b>-0.887**</b> |
| SD       |       |        |               |               |                |                 |                |                 | <b>-0.584*</b>  | <b>0.872**</b>  | <b>-0.564*</b>  | <b>-0.664*</b>  | <b>-0.665*</b>  |
| PPO      |       |        |               |               |                |                 |                |                 |                 | <b>-0.727**</b> | 0.123           | <b>0.843**</b>  | <b>0.921**</b>  |
| Starch   |       |        |               |               |                |                 |                |                 |                 |                 | -0.412          | <b>-0.733**</b> | <b>-0.837**</b> |
| Protein  |       |        |               |               |                |                 |                |                 |                 |                 |                 | <b>0.843**</b>  | 0.165           |
| Ash      |       |        |               |               |                |                 |                |                 |                 |                 |                 |                 | <b>0.853**</b>  |

LaSRC: lactic acid solvent retention capacity; SCSRC: sodium carbonate solvent retention capacity; SuSRC: sucrose solvent retention capacity; WSRC: water solvent retention capacity; *L*: CIE *L* value; *a*: CIE *a* value; *b*: CIE *b* value; SD: Starch Damage; PPO: Polyphenoxidase activity; TS: Total Starch; ISF: Insoluble Fiber.

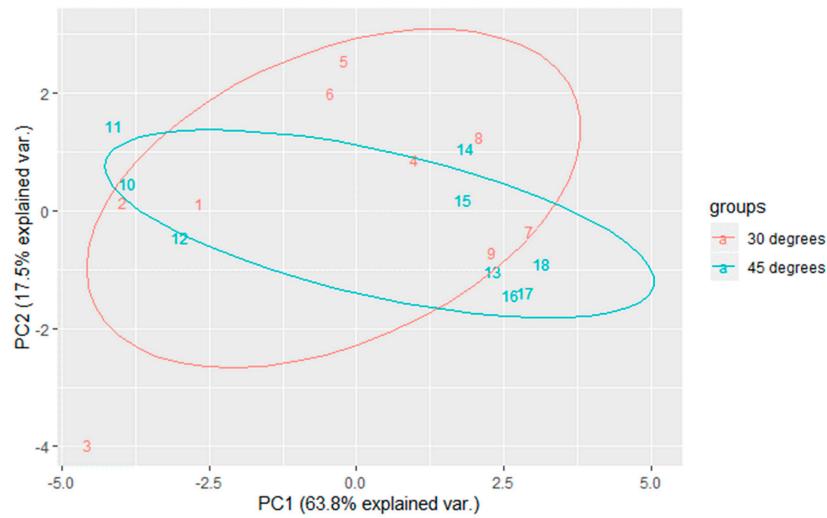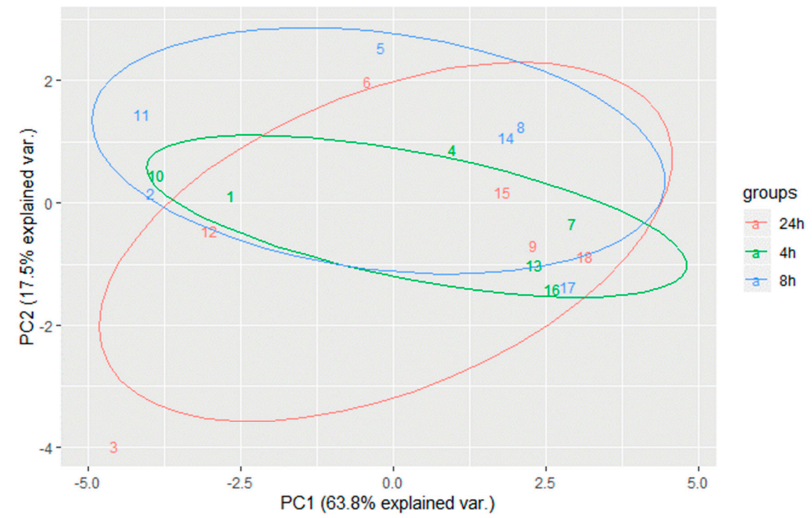

**Figure S1.** Principal component (PC) analysis of intermediate wheatgrass flour obtained after different tempering treatments. Ellipses represent sample categorization via (a) temperature; (b) incubation time.
